# Supplementary material for: Mycobacterium leprae-induced Insulin-like Growth Factor I attenuates antimicrobial mechanisms, promoting bacterial survival in macrophages
Source: PubMed Central journal article supplement (PMC4901318; doi:10.1038/srep27632), 2016-06-10
Supplement: srep27632-s1.pdf [file srep27632-s1.pdf]

1 **Supplementary Information**

2  
3 ***Mycobacterium leprae*-induced Insulin-like Growth Factor I attenuates**  
4 **antimicrobial mechanisms, promoting bacterial survival in macrophages**

5  
6 **Leonardo Ribeiro Batista Silva<sup>1¶</sup>, Luciana Silva Rodrigues<sup>1¶\*</sup>, Aislan de Carvalho Vivarini<sup>2</sup>,**  
7 **Fabrício da Mota Ramalho Costa<sup>1</sup>, Katherine Antunes de Mattos<sup>1&</sup>, Maria Renata Sales**  
8 **Nogueira Costa<sup>3</sup>, Patricia Sammarco Rosa<sup>3</sup>, Thiago Gomes Toledo Pinto<sup>4</sup>, André Alves**  
9 **Dias<sup>1</sup>, Danielle Fonseca Moura<sup>4</sup>, Euzenir Nunes Sarno<sup>4</sup>, Ulisses Gazos Lopes<sup>2</sup>, Maria**  
10 **Cristina Vidal Pessolani<sup>1▲</sup>.**

11  
12 <sup>1</sup>Laboratory of Cellular Microbiology, Oswaldo Cruz Institute, Rio de Janeiro, 21040-900, RJ, Brazil;

13 <sup>2</sup>Laboratory of Molecular Parasitology, Carlos Chagas Filho Institute, Federal University of Rio de Janeiro (UFRJ),  
14 Rio de Janeiro, 21940-590, RJ, Brazil;

15 <sup>3</sup>Lauro de Souza Lima Institute, Bauru, 17034-971, SP, Brazil;

16 <sup>4</sup>Leprosy Laboratory, Oswaldo Cruz Institute, Rio de Janeiro, 21040-900, RJ, Brazil.

17  
18 Present address: <sup>\*</sup>Laboratory of Immunopathology, Rio de Janeiro State University (UERJ), Rio de Janeiro, 20550-  
19 170, RJ, Brazil; <sup>&</sup>Laboratory of Quality Control, Immunobiological Technology Institute, Bio-Manguinhos, Oswaldo  
20 Cruz Foundation, Rio de Janeiro, 21040-900, RJ, Brazil.

21  
22 <sup>▲</sup> Correspondence should be addressed to: Dr. Pessolani, Laboratory of Cellular Microbiology, Oswaldo Cruz  
23 Institute, Oswaldo Cruz Foundation (FIOCRUZ), Rio de Janeiro, RJ, Brazil 21045-900; [cpessola@ioc.fiocruz.br](mailto:cpessola@ioc.fiocruz.br);  
24 Tel. (+55) 21 2562-1595.

25  
26 <sup>¶</sup> These authors contributed equally to this work.

## Supplementary Figure 1

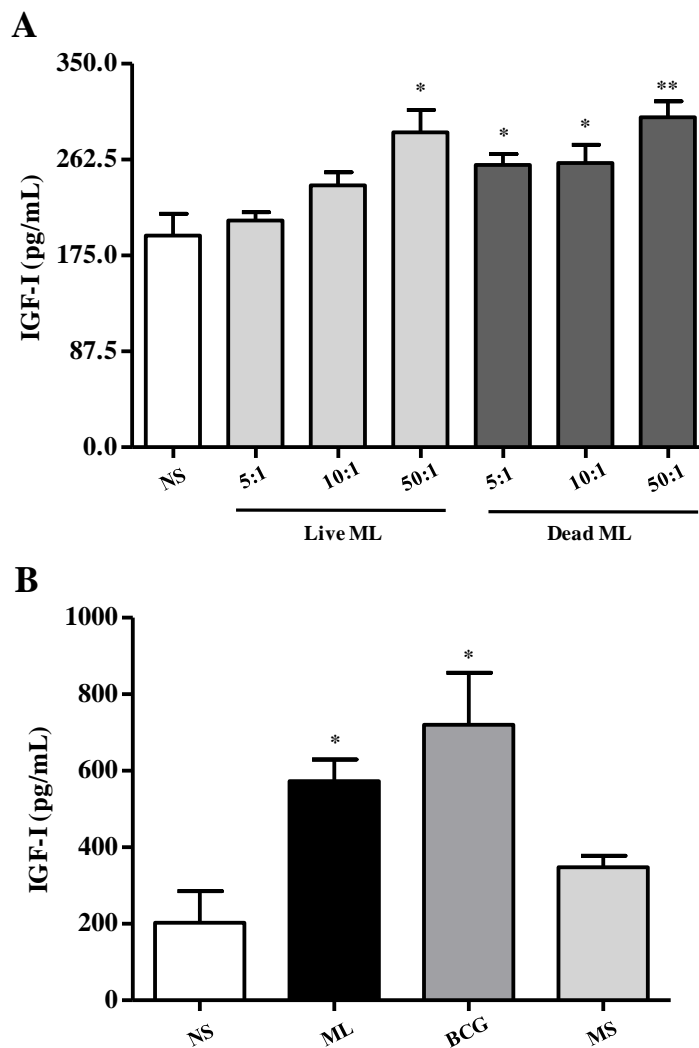

27

28

29 **Supplementary Figure 1 | IGF-I is produced by *in vitro* ML and BCG-stimulated**

30 **macrophages, but not by *M. smegmatis* (MS).** (A) RAW 264.7 macrophages were exposed to

31 live or dead (irradiated) ML at different bacteria. ratios: cell ratio (5, 10 and 50) for 48h. IGF-I

32 protein levels were measured in culture supernatants by specific sandwich ELISA. Data are

33 shown as mean  $\pm$  SE from six independent experiments performed in duplicate. (B) RAW 264.7

34 macrophages were exposed to dead ML, BCG, or MS at bacteria: cell ratio (50) for 48h. IGF-I  
35 protein levels were measured in culture supernatants by specific sandwich ELISA. Data are  
36 shown as mean  $\pm$  SE from six independent experiments performed in duplicate. An ANOVA test  
37 followed by Bonferroni as a post test were performed and used for statistical analysis. \* $p < 0.05$ ,  
38 \*\* $p < 0.005$ .

### Supplementary Figure 2

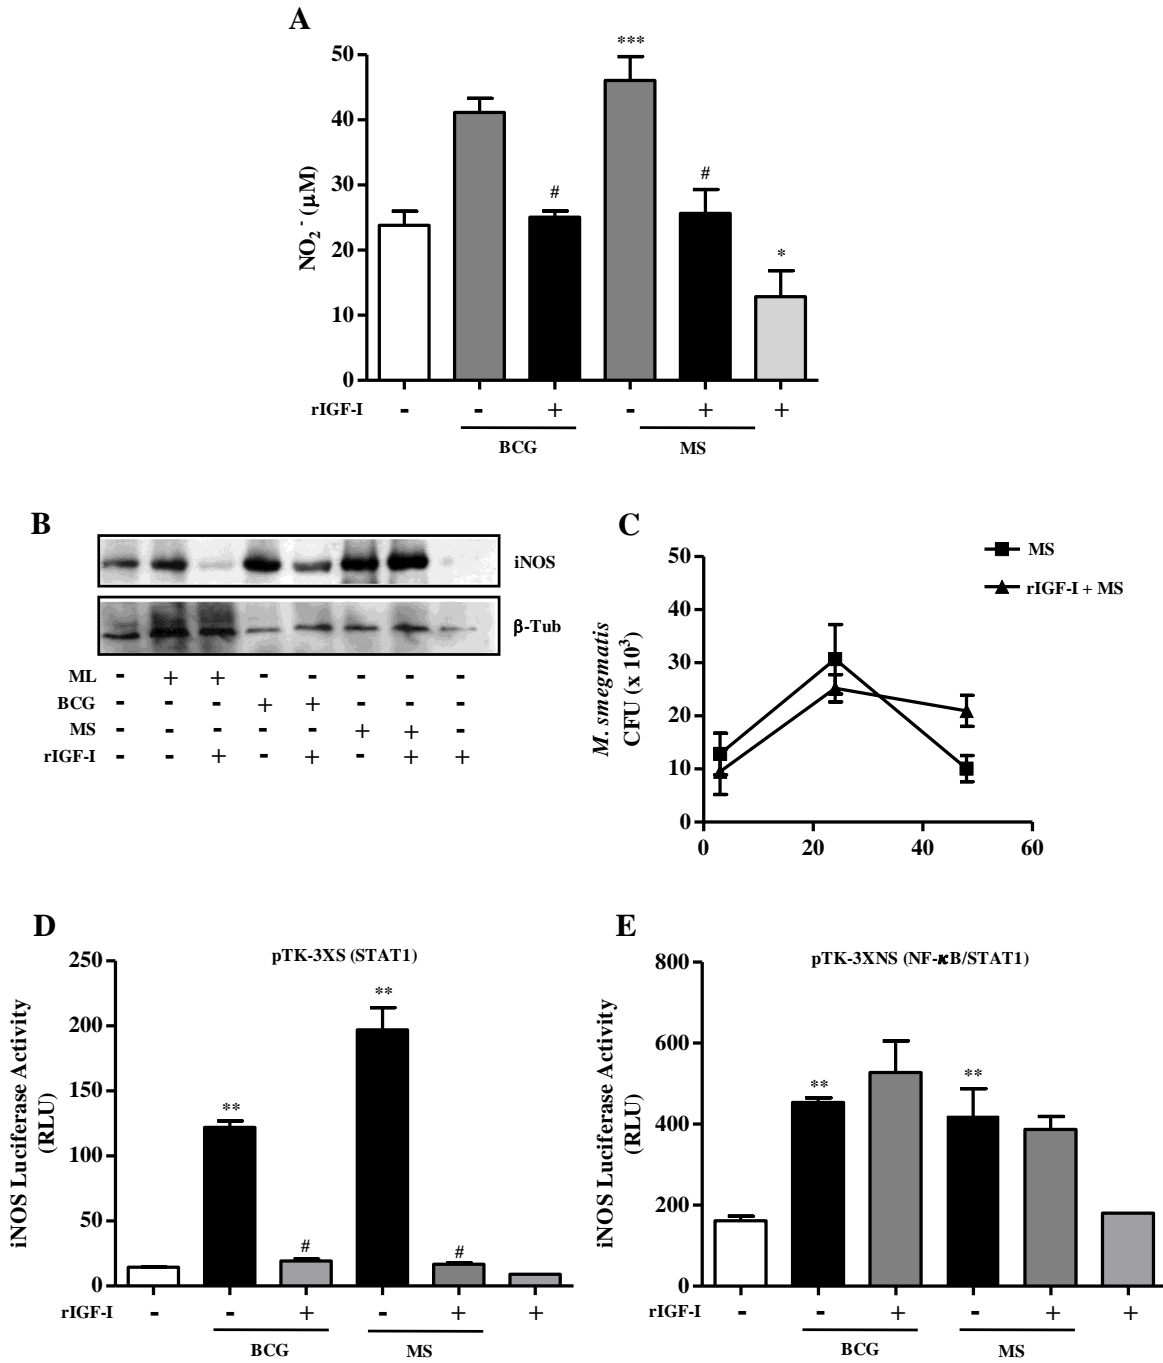

40

41

42 **Supplementary Figure 2 | The macrophage microbicidal response to nonpathogenic**  
43 **mycobacteria is downregulated by IGF-I.** (A) RAW 264.7 cultures were pre-treated with rIGF-  
44 I (50ng/ml) for 30 min and then exposed to irradiated BCG or MS at a bacteria: cell ratio of 50.  
45 After 48h stimulation, nitrite was measured in the supernatants by the Griess reagent. Each value  
46 represents the mean  $\pm$  SE of three independent experiments performed in duplicate. (B) Total  
47 lysates from cultures were subjected to Western blot using the specific antibodies against iNOS  
48 and  $\beta$ -tubulin ( $\beta$ -Tub). The Figure shows a representative Western blot from three independent  
49 experiments. (D and E) RAW 264.7 cells transiently transfected with iNOS-luciferase reporter  
50 constructs pTK-3XS (D) or pTK-3XNS (E) were pre-treated with rIGF-I and then incubated with  
51 each mycobacterium for 24h, as described above. The cells were harvested and the luciferase  
52 activity determined by using the luciferase reporter assay system. Data are shown as mean  $\pm$  SD  
53 of a representative experiment from three different experiments performed in triplicate. (C)  
54 Intracellular growth/survival of MS in macrophages pre-treated with rIGF-I was analyzed by the  
55 colony forming unit (CFU). Data are expressed as mean  $\pm$  SD of the fold increase from three  
56 independent experiments performed in triplicate. An ANOVA test followed by a Bonferroni post  
57 test were performed and used for statistical analysis. \* Statistically significant comparisons  
58 between unstimulated cultures and those incubated with mycobacterium. #Statistically significant  
59 comparisons between culture mycobacterium with mycobacteria in the presence or absence of  
60 rIGF-I. \* $p < 0.05$ , \*\*\* $p < 0.0001$ , RLU, relative luminescence units.

### Supplementary Figure 3

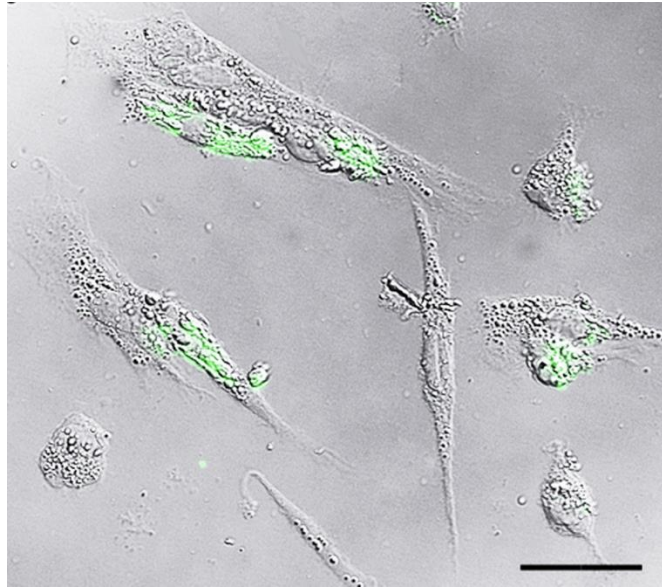

62

63

64 **Supplementary Figure 3 | *In vivo* ML-infected macrophages isolated from skin lesions of**  
65 **LL patients.** Fluorescence image of Virchow cells isolated from anLL skin lesion visualized by  
66 DIC and obtained by a Zeiss Colibri fluorescence microscope. The results shown are  
67 representative of a single experiment with three replicates/cultures. Scale bar = 100 $\mu$ m.
